# Supplementary material
Source: publisher figshare collection journal article supplement (https://tandf.figshare.com/articles/dataset/_/26124126)
Supplement: Supplementary file 1 [file 1]

4/1/2024 1:06:54 PM  
Number of variables: 24  
Number of subjects: 295  
Number of replications: 100

| Kigenvalue # | Random Kigenvalue | Standard Dev |
|--------------|-------------------|--------------|
| 1            | 1.5717            | .0552        |
| 2            | 1.4675            | .0344        |
| 3            | 1.4011            | .0290        |
| 4            | 1.3399            | .0268        |
| 5            | 1.2873            | .0259        |
| 6            | 1.2381            | .0215        |
| 7            | 1.1915            | .0240        |
| 8            | 1.1488            | .0232        |
| 9            | 1.1075            | .0214        |
| 10           | 1.0709            | .0199        |
| 11           | 1.0330            | .0195        |
| 12           | 0.9942            | .0182        |
| 13           | 0.9548            | .0176        |
| 14           | 0.9208            | .0171        |
| 15           | 0.8860            | .0182        |
| 16           | 0.8504            | .0183        |
| 17           | 0.8196            | .0203        |
| 18           | 0.7832            | .0214        |
| 19           | 0.7501            | .0221        |
| 20           | 0.7141            | .0186        |
| 21           | 0.6798            | .0194        |
| 22           | 0.6394            | .0203        |
| 23           | 0.6001            | .0223        |
| 24           | 0.5503            | .0283        |

4/1/2024 1:06:55 PM

Monte Carlo PCA for Parallel Analysis  
©2000-2020 by Marley W. Watkins. All rights reserved.
